# Supplementary material
Source: Royal Society of Chemistry journal article supplement (doi:10.1039/d6nr01748g)
Supplement: d6nr01748g1.pdf [file d6nr01748g1.pdf]

## Supporting Information

# Firefly-inspired smart aerogel-based phase-change composite for intelligent microwave absorption

*Junqing Shi<sup>a</sup>, Jialong Tian<sup>a</sup>, Haoxuan Zhao<sup>a</sup>, Qufu Wei<sup>a,b</sup>, Yibing Cai<sup>a,b\*</sup>*

<sup>a</sup>College of Textile Science and Engineering, Jiangnan University, Wuxi, Jiangsu  
214122, the People's Republic of China

<sup>b</sup>Key Laboratory of Special Protective Textiles, Ministry of Education, Jiangnan  
University, Wuxi, Jiangsu 214122, the People's Republic of China

\*Corresponding author

Yibing Cai, E-mail address: [yibingcai@jiangnan.edu.cn](mailto:yibingcai@jiangnan.edu.cn)

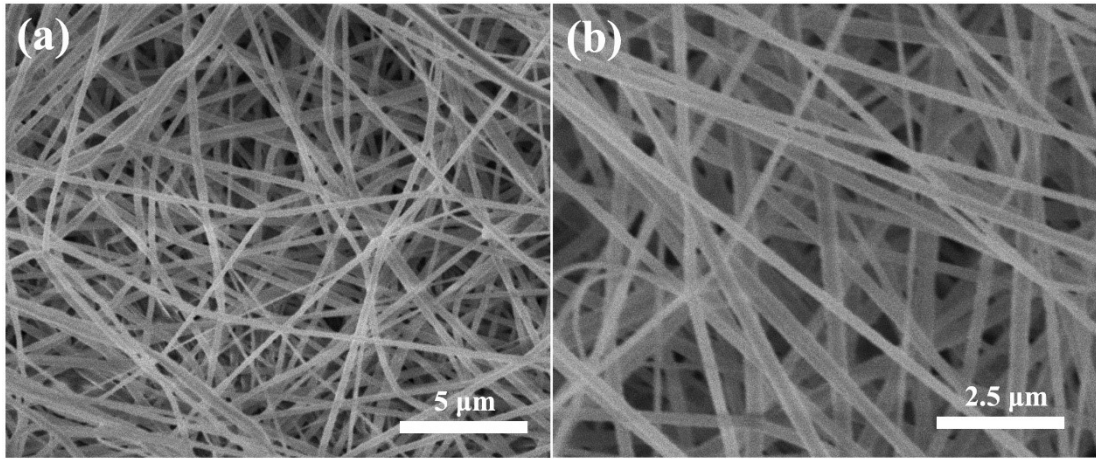

**Fig. S1.** SEM images of PAN/PVP nanofiber (a, b).

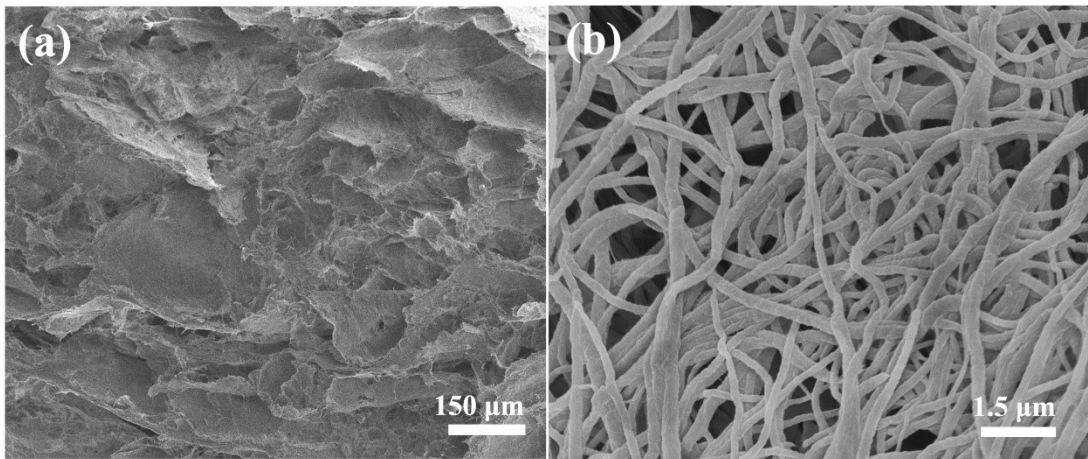

**Fig. S2.** SEM images of 2P (a, b).

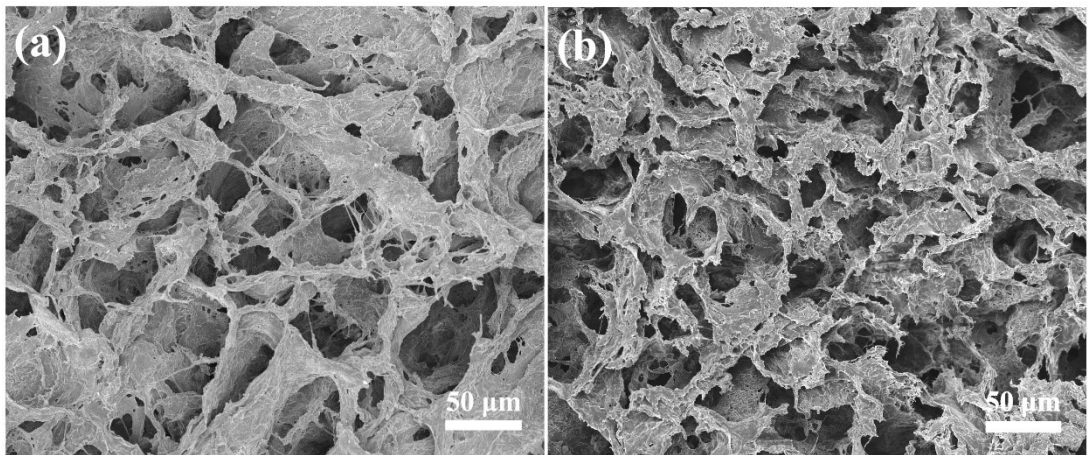

**Fig. S3.** SEM images of 3P (a, b).

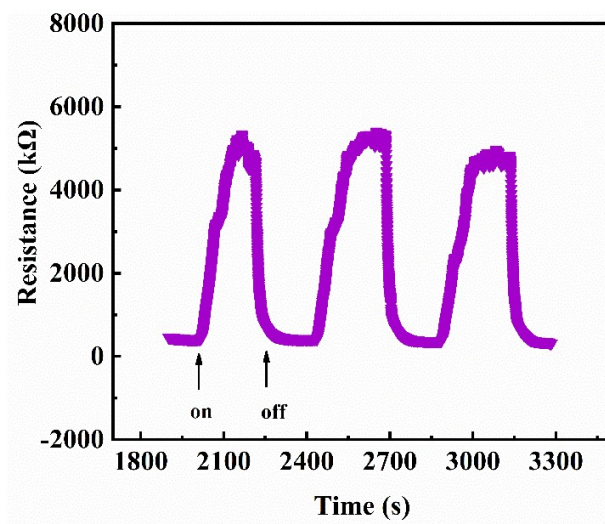

**Fig. S4.** Time-resistance curve of 3PC/PEG.

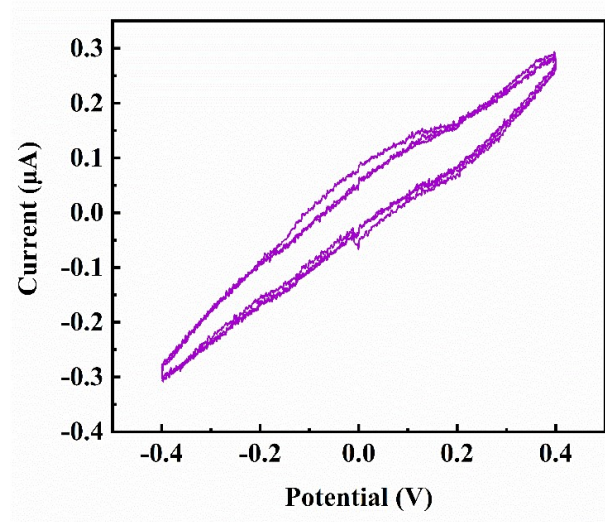

**Fig. S5.** CV curve of 3PC/mPEG.

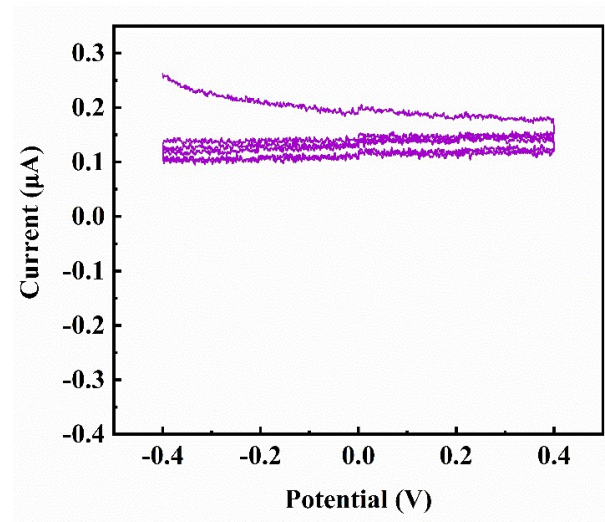

**Fig. S6.** CV curve of 3PC/cPEG.

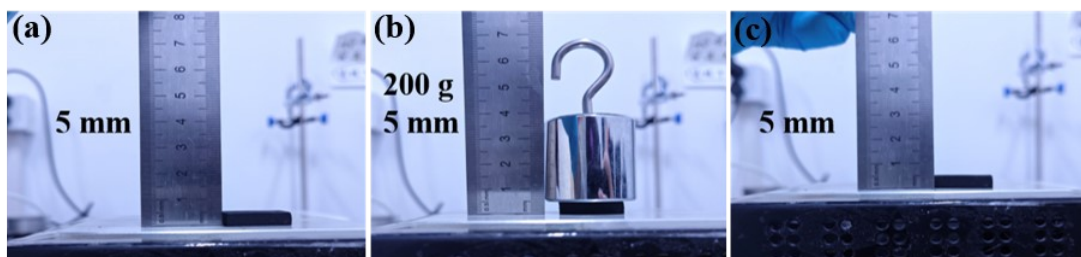

**Fig. S7.** Optical images of 3PC/PEG loaded with 200 g weight on a 45 °C hot stage (a-c).

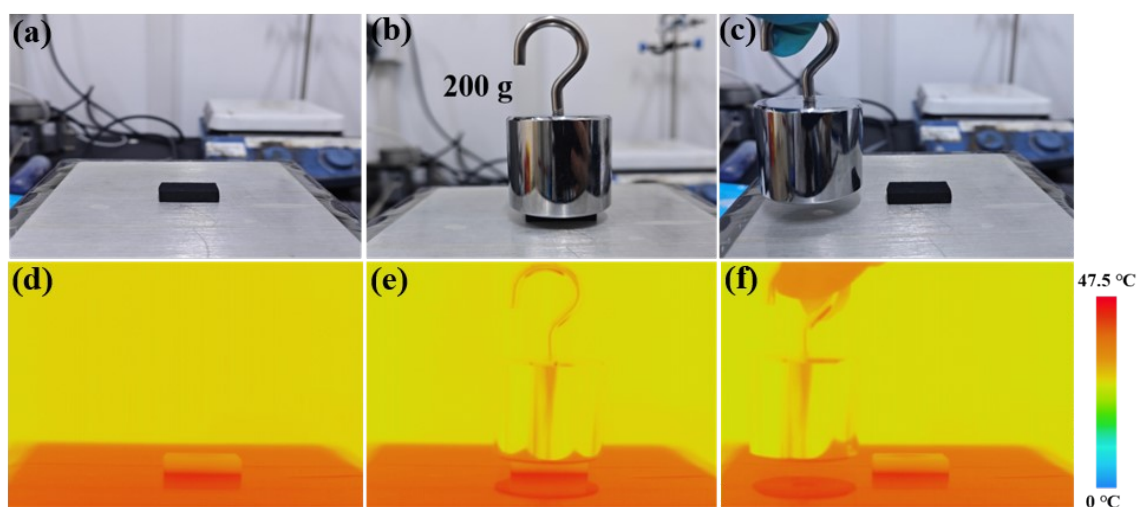

**Fig. S8.** Thickness change images (a-c) and infrared thermal imaging images (d-f) of 3PC/PEG before and after loading a weight of 200 g on a 45 °C hot stage.

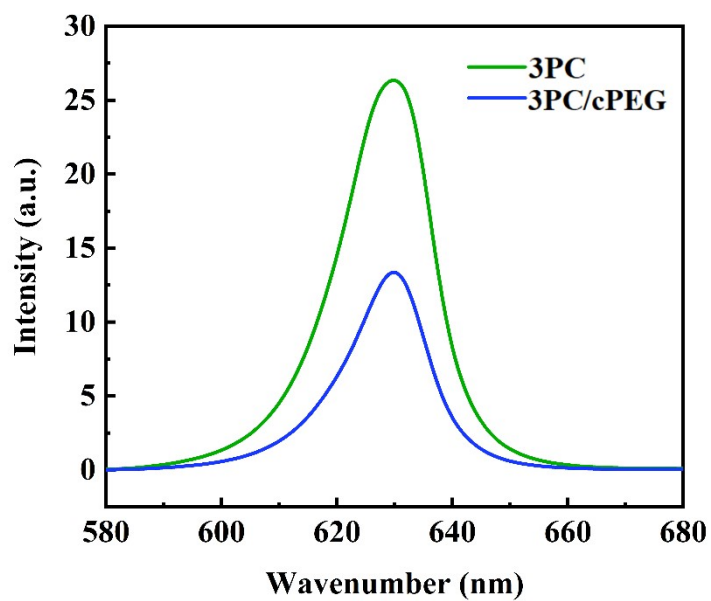

**Fig. S9.** PL spectra of 3PC and 3PC/cPEG.

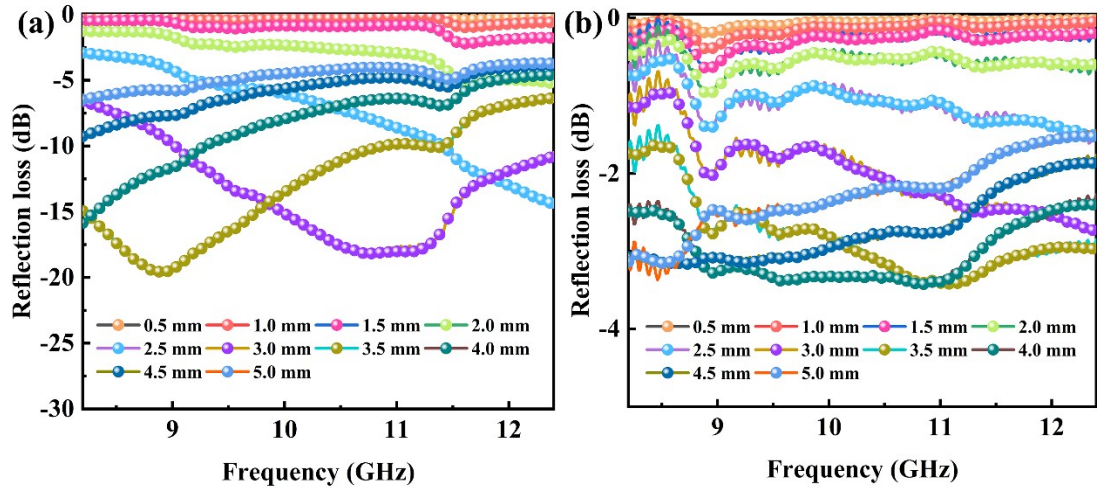

**Fig. S10.** Reflection loss maps for 3PC/mPEG2000, and 3PC/cPEG2000.

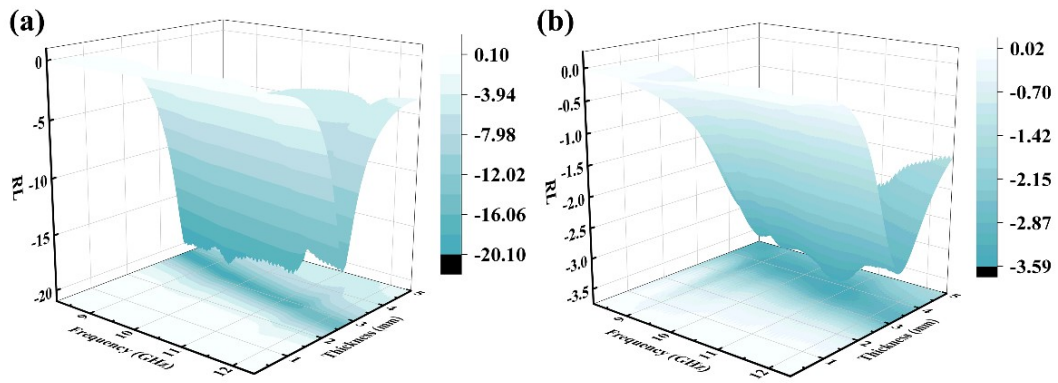

**Fig. S11.** 3D reflection loss maps for 3PC/mPEG2000, and 3PC/cPEG2000.

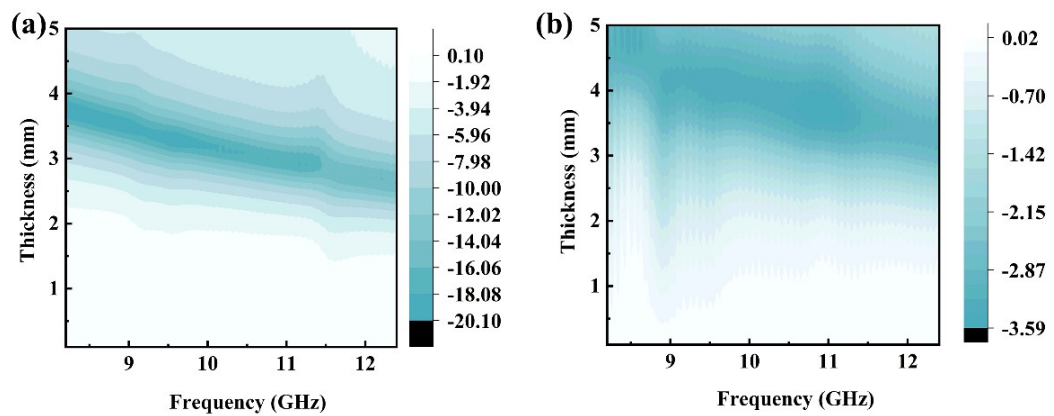

**Fig. S12.** 2D reflection loss maps for 3PC/mPEG2000, and 3PC/cPEG2000.

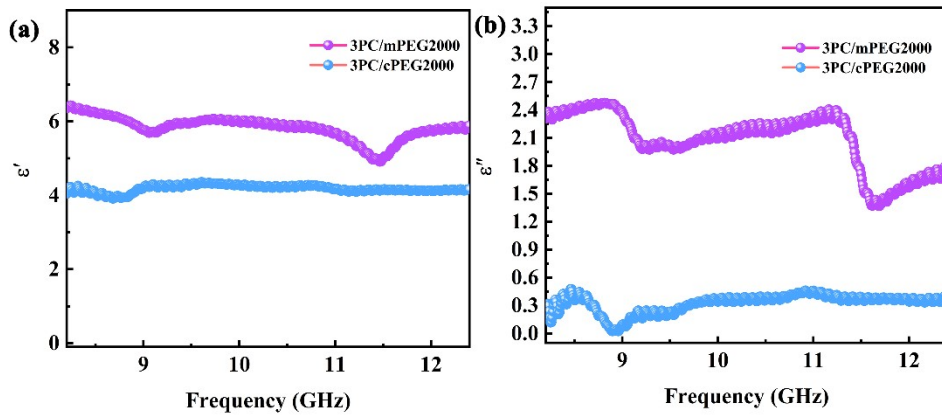

**Fig. S13.** The dielectric constant real part (a), dielectric constant imaginary part (b) for 3PC/mPEG2000, and 3PC/cPEG2000.

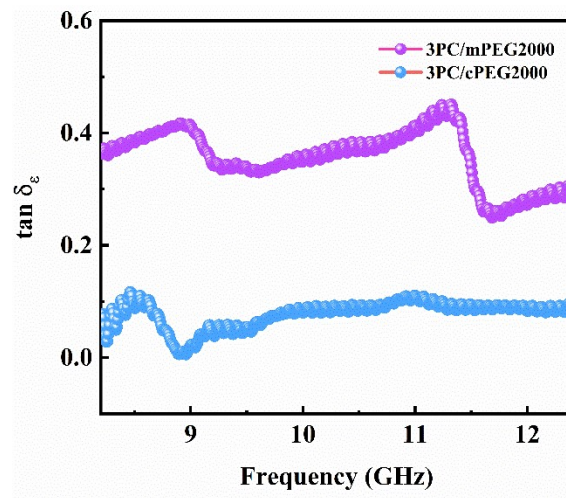

**Fig. S14.** Dielectric loss tangent for 3PC/mPEG2000, and 3PC/cPEG2000.

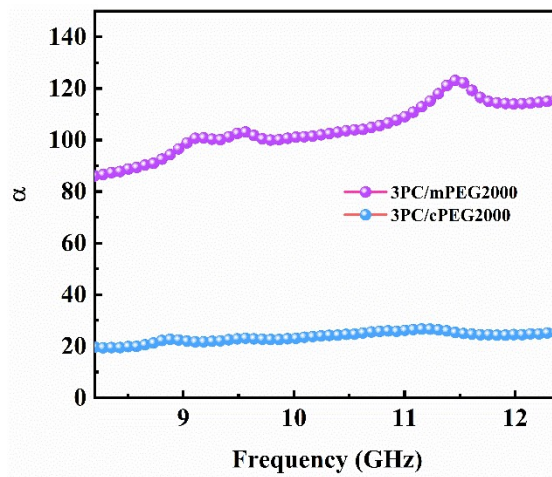

**Fig. S15.** Attenuation coefficient for 3PC/mPEG2000, and 3PC/cPEG2000.

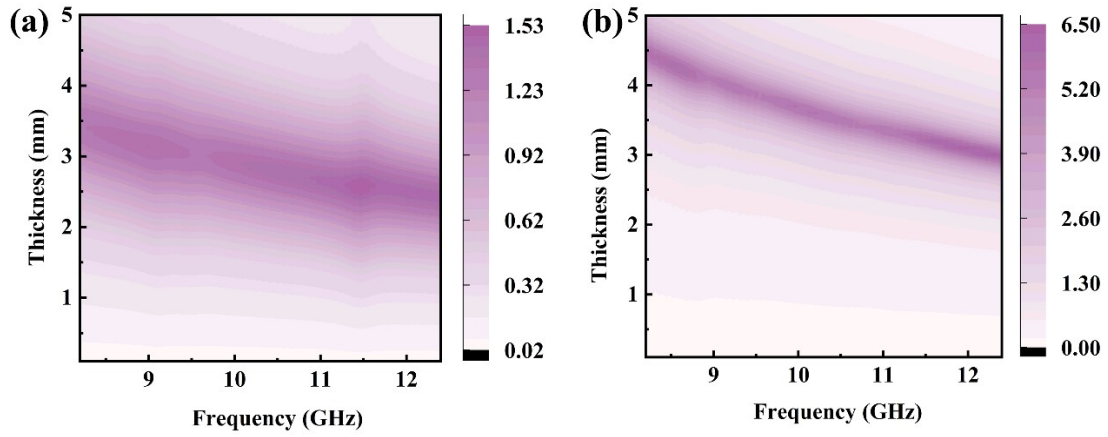

**Fig. S16.** Impedance matching diagrams for 3PC/mPEG2000, and 3PC/cPEG2000.

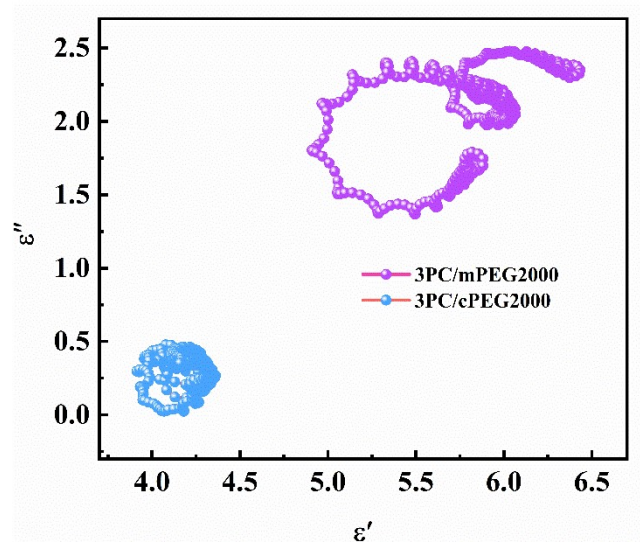

**Fig. S17.** Cole-Cole curves for 3PC/mPEG2000, and 3PC/cPEG2000.

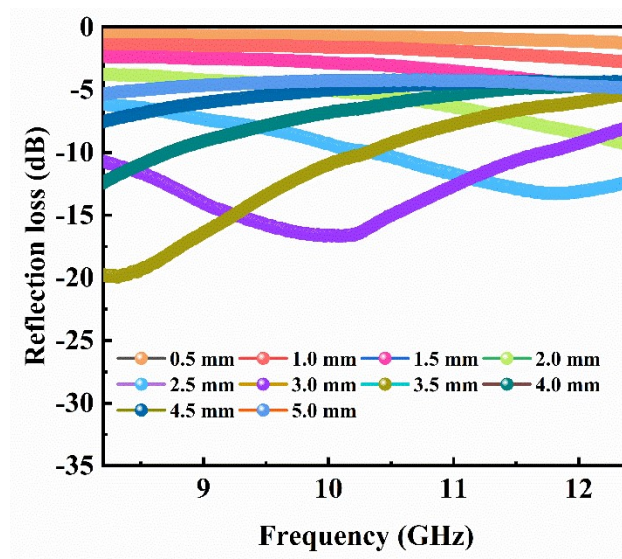

**Fig. S18.** Reflection loss curves of 3PC/mPEG at different thicknesses after 50 melting-solidification cycles.

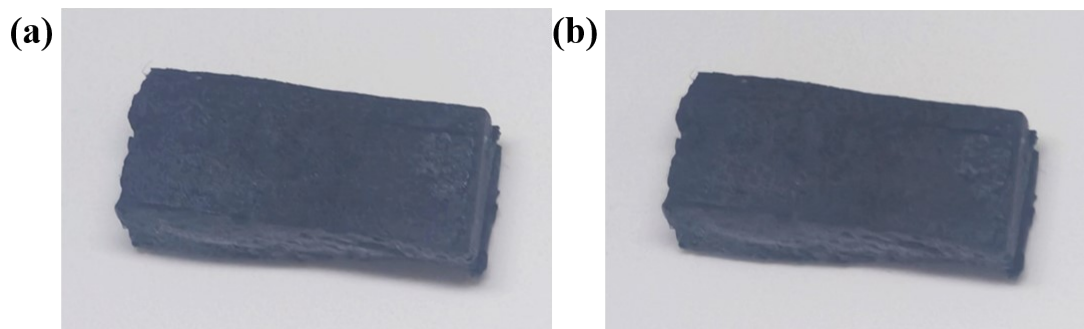

**Fig. S19.** Digital images of 3PC/mPEG on filter paper before (a) and after (b) melting-solidification cycles.

The scattering parameters (S11 and S21) were obtained using the waveguide method. The EMI SE ( $SE_T$ ) of the specimen was calculated based on our previous published work[1].

Based on the transmission line theory of 8-12 GHz, the electromagnetic parameters of the sample were recorded.

the RL is evaluated using the following equations:

$$RL = 20 \times \log \left| \frac{Z_{in} - Z_0}{Z_{in} + Z_0} \right| \quad (1)$$

The calculation formulas for the attenuation constant ( $\alpha$ ) and impedance matching ( $Z$ ) characteristics are as follows:

$$Z = \frac{Z_{in}}{Z_0} = \sqrt{\frac{\mu_r}{\epsilon_r}} \times \tanh \times [2\pi f d j / c \times \sqrt{\mu_r \epsilon_r}] \quad (2)$$

$$\alpha = \frac{\sqrt{2\pi f}}{c} \times \sqrt{(\mu'' \epsilon'' - \mu' \epsilon') - \sqrt{(\mu'' \epsilon'' - \mu' \epsilon')^2 + (\mu' \epsilon'' - \mu'' \epsilon')^2}} \quad (3)$$

$Z_{in}$  and  $Z_0$  represent the input impedance and the impedance of free space, respectively.  $\epsilon_r$  and  $\mu_r$  represent the complex permittivity and complex permeability.  $\epsilon'$ ,  $\epsilon''$ ,  $\mu'$ ,  $\mu''$  correspond to the real and imaginary parts of the dielectric constant and the real and imaginary parts of the permeability, respectively. Where  $d$ ,  $c$  and  $f$  are the matching thickness, the speed of light in vacuum and the microwave frequency respectively.

## References

- [1] J. Shi, J. Tian, Y. Xu, F. Huang, Q. Wei, Y. Cai, *J. Mater. Chem. A*, 2025, **13**, 24028-24037.
